# Supplementary material
Source: publisher site journal article supplement (https://www.dovepress.com/article/411437)
Supplement: Supplementary file 1 [file get_supplementary_file.php]

**SUPPLEMENTARY MATERIALS**

**Supplementary Table 1.** Summary of PS model balance for rescue medication prescriptions and adherence outcomes

| **Timepoint** | **Unweighted model**  **Covariates with insufficienta balance (%)** | **Weighted model**  **Covariates with insufficienta balance (%)** |
| --- | --- | --- |
| **Rescue medication** | | |
| 6 months | 8/46 (17.4) | 0/46 (0.0) |
| 12 months | 8/50 (16.0) | 0/50 (0.0) |
| 18 months | 7/48 (14.6) | 0/48 (0.0) |
| 24 months | 10/47 (21.3) | 1/47 (2.1) |
| **Adherence** | | |
| 6 months | 8/35 (22.9) | 0/35 (0) |
| 12 months | 8/33 (24.2) | 0/33 (0.0) |
| 18 months | 9/35 (25.7) | 0/35 (0.0) |
| 24 months | 10/32 (31.3) | 1/32 (3.1) |

aStandardized mean difference >10

**Abbreviations:** OLO, olodaterol; PS, propensity score; TIO, tiotropium bromide; UMEC; umeclidinium; VI, vilanterol.

**Supplementary Table 2.** Sensitivity analysis: treatment-effects estimation values for rescue medication prescriptions for UMEC/VI versus TIO/OLO using the on-treatment analysis

|  | **Unweighted** | | **Weighted** | |
| --- | --- | --- | --- | --- |
| **Timepoint** | **Covariates with insufficienta balance (%)** | **Mean difference (95% CI);  p-value** | **Covariates with insufficienta balance (%)** | **Mean difference (95% CI);  p-value** |
| 6 months | 8/45 (17.8) | –0.30 (–0.44, –0.15);  p=0.0001 | 0/45 (0) | –0.15 (–0.31, 0.00);  p=0.056 |
| 12 months | 8/46 (17.4) | –0.52 (–0.83, 0.21);  p=0.0011 | 0/46 (0) | –0.26 (–0.59, 0.08);  p=0.1393 |
| 18 months | 8/45 (17.8) | –1.02 (–1.56, –0.49);  p=0.0002 | 0/45 (0) | –0.63 (–1.21, –0.05);  p=0.0332 |
| 24 months | 10/42 (23.8) | –1.61 (–2.41, –0.81);  p=0.0001 | 1/42 (2.4) | –1.15 (–2.03, –0.28);  p=0.0101 |

aStandardized mean difference >10.

**Abbreviations:** CI, confidence interval; OLO, olodaterol; TIO, tiotropium bromide; UMEC; umeclidinium; VI, vilanterol.

**Supplementary Table 3.** Patient demographics and baseline characteristics, stratified by adherence (PDC <80%, PDC ≥80%)

| **Characteristic** | **UMEC/VI (n=4,913)** | | **TIO/OLO**  **(n=1,514)** | |
| --- | --- | --- | --- | --- |
| **PDC <80%  (non-adherent)**  **(n=3,391)** | **PDC ≥80% (adherent)**  **(n=1,522)** | **PDC <80%  (non-adherent)**  **(n=982)** | **PDC ≥80% (adherent)**  **(n=532)** |
| **Age, years, mean (SD)a** | 69.1 (10.8) | 69.7 (9.9) | 69.7 (10.3) | 69.9 (9.7) |
| **Female, n (%)** | 1,494 (44.1) | 679 (44.6) | 456 (46.4) | 258 (48.5) |
| **BMI, mean (SD)a,b** | 27.2 (6.1) | 27.2 (6.1) | 27.2 (6.4) | 27.5 (6.2) |
| **Patient region, n (%)**  East Midlands  East of England  London  North East  North West  South Central  South East Coast  South West  West Midlands  Yorkshire and the Humber | 35 (1.0)  70 (2.1)  290 (8.6)  47 (1.4)  650 (19.3)  394 (11.7)  198 (5.9)  843 (25.1)  547 (16.3)  289 (8.6) | 14 (0.9)  60 (4.0)  78 (5.2)  37 (2.5)  427 (28.4)  139 (9.2)  112 (7.4)  200 (13.3)  243 (16.1)  195 (13.0) | 7 (0.7)  25 (2.6)  50 (5.1)  105 (10.7)  247 (25.2)  220 (22.4)  68 (6.9)  165 (16.8)  52 (5.3)  41 (4.2) | 8 (1.5)  14 (2.6)  25 (4.7)  56 (10.6)  162 (30.6)  103 (19.5)  28 (5.3)  73 (13.8)  20 (3.8)  40 (7.6) |
| **FEV1 % predicted in baseline period, n (%)c**  GOLD grade 1: FEV1 % predicted ≥80%  GOLD grade 2: FEV1 % predicted ≥50–<80%  GOLD grade 3: FEV1 % predicted ≥30–<50%  GOLD grade 4: FEV1 % predicted <30% | 397 (15.2)  1,551 (59.6)  582 (22.4)  74 (2.8) | 166 (14.0)  710 (59.8)  279 (23.5)  32 (2.7) | 119 (15.1)  481 (61.0)  163 (20.7)  25 (3.2) | 58 (13.6)  264 (62.0)  91 (21.4)  13 (3.1) |
| **GOLD 2019 group, n (%)d**  A  B  C  D | 1,359 (43.0)  1,153 (36.5)  345 (10.9)  302 (9.6) | 622 (43.7)  516 (36.2)  143 (10.0)  143 (10.0) | 377 (41.1)  351 (38.2)  77 (8.4)  113 (12.3) | 225 (44.6)  171 (33.9)  56 (11.1)  53 (10.5) |
| **MRC Dyspnea Scale score, n (%)e**  1f  2  3  4  5f  Unknown | 334 (9.8)  1,370 (40.4)  1,047 (30.9)  359 (10.6)  49 (1.4)  232 (6.8) | 145 (9.5)  620 (40.7)  466 (30.6)  178 (11.7)  15 (1.0)  98 (6.4) | 108 (11.0)  346 (35.2)  329 (33.5)  122 (12.4)  13 (1.3)  64 (6.5) | 55 (10.3)  226 (42.5)  157 (29.5)  56 (10.5)  11 (2.1)  27 (5.1) |
| **Smoking status, n (%)a**  Current smoker  Former smoker  Non-smoker  Unknown | 1,912 (56.4)  1,408 (41.5)  69 (2.0)  2 (0.1) | 846 (55.6)  647 (42.5)  25 (1.6)  4 (0.3) | 541 (55.1)  413 (42.1)  28 (2.9)  0 (0.0) | 299 (56.2)  215 (40.4)  17 (3.2)  1 (0.2) |
| **Comorbidities, n (%)g**  Rheumatoid/osteoarthritis  Depression  Diabetes  Anxiety  Gastroesophageal reflux disease  Stroke  Acute myocardial infarction  Congestive heart failure  Dementia/cognitive impairment  Bronchiectasis  Lung cancer | 1,134 (33.4)  1,107 (32.6)  708 (20.9)  687 (20.3)  617 (18.2)  371 (10.9)  345 (10.2)  298 (8.8)  232 (6.8)  92 (2.7)  27 (0.8) | 519 (34.1)  470 (30.9)  305 (20.0)  298 (19.6)  268 (17.6)  176 (11.6)  177 (11.6)  131 (8.6)  115 (7.6)  45 (3.0)  10 (0.7) | 356 (36.3)  309 (31.5)  203 (20.7)  188 (19.1)  180 (18.3)  115 (11.7)  120 (12.2)  92 (9.4)  88 (9.0)  27 (2.7)  7 (0.7) | 175 (32.9)  176 (33.1)  110 (20.7)  96 (18.0)  95 (17.9)  53 (10.0)  57 (10.7)  42 (7.9)  37 (7.0)  13 (2.4)  2 (0.4) |
| **Current asthma diagnosis, n (%)h** | 264 (7.9) | 128 (8.6) | 86 (9.0) | 50 (9.5) |
| **Historical** **asthma diagnosis, n (%)i** | 589 (17.7) | 225 (15.2) | 189 (19.7) | 79 (15.1) |
| **Moderate-to-severe exacerbations, n (%)j** | 1,046 (30.8) | 456 (30.0) | 308 (31.4) | 157 (29.5) |
| **Respiratory therapies received, n (%)**  No use  Any use  LAMAk  SABA (not overlapping SAMA)k  SAMA (not overlapping SABA)k  SAMA/SABA (FDC and open)k  Xanthinek | 418 (12.3)  2,973 (87.7)  1,789 (52.8)  2,624 (77.4)  67 (2.0)  95 (2.8)  6 (0.2) | 114 (7.5)  1,408 (92.5)  965 (63.4)  1,271 (83.5)  32 (2.1)  30 (2.0)  5 (0.3) | 78 (7.9)  904 (92.1)  558 (56.8)  825 (84.0)  14 (1.4)  17 (1.7)  3 (0.3) | 20 (3.8)  512 (96.2)  341 (64.1)  465 (87.4)  11 (2.1)  16 (3.0)  0 (0.0) |

Note: Only patients with a minimum of 12 months were included in the calculations for adherence at each time point.

aAt index; bUMEC/VI: n=6,438; TIO/OLO: n=2,036; cUMEC/VI: n=5,077; TIO/OLO: n=1,651; dA composite measure of COPD severity using AECOPD events in the prior 12 months and MRC grade in the prior 24 months; eMost recent score in the 24 months prior to index; f1Not troubled by breathlessness except on strenuous exercise; f5Too breathless to leave the house; gAt any time in the patients history; hAt any time in the 24 months pre-index (inclusive); i≥24 months pre-index; jBased on a validated algorithm, defined as the presence of one of the following events:
i. Antibiotic and OCS prescriptions for 5–14 days with the same start date; ii. ≥2 symptoms of breathlessness, cough, sputum volume or purulence and an antibiotic or OCS prescription on the same day; iii. Lower respiratory tract infection code; iv. Exacerbation specific medical code; kPercentages calculated for the full cohort.

**Abbreviations:** AECOPD, acute exacerbation of COPD; BMI, body mass index; COPD, chronic obstructive pulmonary disease; FDC, fixed-dose combination; FEV1, forced expiratory volume in 1 second; GOLD, Global Initiative for Chronic Obstructive Lung Disease; LAMA, long-acting muscarinic antagonist; MRC, Medical Research Council; NR, not reported; OCS, oral corticosteroid; OLO, olodaterol; SABA, short-acting β2-agonist; SD, standard deviation; SAMA, short-acting muscarinic antagonist; TIO, tiotropium bromide; UMEC; umeclidinium; VI, vilanterol.

**Supplementary Table 4.** Adherent patients (PDC ≥80%) at 6-, 12-, 18- and 24-months post-index with stockpiling

| **Patients with PDC ≥80% (%)** | **Unweighted** | | **Weighted** | |
| --- | --- | --- | --- | --- |
| **UMEC/VI** | **TIO/OLO** | **UMEC/VI** | **TIO/OLO** |
| 6 months | 44.3 | 49.5 | 44.5 | 50.1 |
| 12 months | 35.8 | 40.5 | 36.0 | 40.9 |
| 18 months | 30.6 | 36.4 | 31.0 | 36.2 |
| 24 months | 28.3 | 35.9 | 28.8 | 36.1 |

**Abbreviations:** OLO, olodaterol; PDC, proportion of days covered; TIO, tiotropium bromide; UMEC, umeclidinium; VI, vilanterol.
